# Supplementary material
Source: publisher figshare collection journal article supplement (https://sage.figshare.com/ndownloader/files/19146650)
Supplement: Supplementary file 1 [file 19146650]

## Utilization and Outcomes of Local Anesthesia and Peripheral Nerve Block for Hybrid Lower Extremity Revascularization

Arash Fereydooni et al. *J Endovasc Ther.* 2020;27(1).

### Appendix 1. List of All Open Surgery and Endovascular Procedure CPT Codes Considered for Data Selection.

| Procedure                                                         | CPT Code     |
|-------------------------------------------------------------------|--------------|
| <b>Open Surgery</b>                                               |              |
| <i>Thromboendarterectomy Aortoiliac</i>                           |              |
| abdominal aorta                                                   | 35331        |
| iliac                                                             | 35351        |
| combined aortoiliac                                               | 35361        |
| combined aortoiliofemoral                                         | 35363        |
| <i>Thromboendarterectomy Femoral-popliteal</i>                    |              |
| common femoral                                                    | 35371        |
| deep (profunda) femoral                                           | 35372        |
| iliofemoral                                                       | 35355        |
| superficial femoral artery                                        | 35302        |
| popliteal artery                                                  | 35303        |
| <i>Thromboendarterectomy Tibial</i>                               |              |
| tibioperoneal trunk artery                                        | 35304        |
| tibial or peroneal artery, initial vessel                         | 35305        |
| each additional tibial or peroneal procedure                      | (+)<br>35306 |
| <i>Bypass Graft Aortoiliac</i>                                    |              |
| Axillary-femoral                                                  | 35521        |
| Axillary-femoral (synthetic graft)                                | 35621        |
| Axillary-femoral-femoral                                          | 35533        |
| Axillary-femoral-femoral (synthetic graft)                        | 35654        |
| Axillary-popliteal or -tibial                                     | 35623        |
| Aortoiliac                                                        | 35537        |
| Aortoiliac (synthetic graft)                                      | 35637        |
| Aortobi-iliac                                                     | 35538        |
| Aortobi-iliac (synthetic graft)                                   | 35638        |
| Aortofemoral                                                      | 35539        |
| Aortofemoral (synthetic graft)                                    | 35647        |
| Aortobifemoral                                                    | 35540        |
| Aortobifemoral (synthetic)                                        | 35646        |
| Aortobifemoral prosthesis after unsuccessful endovascular repair) | 34832        |

|                                                                                    |       |
|------------------------------------------------------------------------------------|-------|
| Femoral-femoral                                                                    | 35558 |
| Femoral-femoral (synthetic graft)                                                  | 35661 |
| Ilioiliac                                                                          | 35563 |
| Ilioiliac (synthetic graft)                                                        | 35663 |
| Iliofemoral                                                                        | 35565 |
| Iliofemoral(synthetic graft)                                                       | 35665 |
| Aortoiliofemoral, unilateral                                                       | 35548 |
| Aortoiliofemoral (synthetic graft)                                                 | 35549 |
| Aortofemoral-popliteal                                                             | 35551 |
| Aortofemoral-popliteal (synthetic graft)                                           | 35651 |
| <i>Bypass Graft Femoral-popliteal</i>                                              |       |
| Femoral-popliteal                                                                  | 35556 |
| Femoral-popliteal (vein conduit in-situ)                                           | 35583 |
| Femoral-popliteal (synthetic graft)                                                | 35656 |
| <i>Bypass Graft Femoral-popliteal-tibial</i>                                       |       |
| Femoral-anterior tibial, posterior tibial, peroneal artery or other distal vessels | 35566 |
| Femoral-anterior tibial, posterior tibial, peroneal artery (in-situ vein)          | 35585 |
| Femoral-anterior tibial, posterior tibial, peroneal artery (synthetic graft)       | 35666 |
| <i>Bypass Graft Tibial</i>                                                         |       |
| Tibial-tibial, peroneal-tibial, or tibial/peroneal trunk-tibial                    | 35570 |
| popliteal-tibial, -peroneal artery or other distal vessels                         | 35571 |
| popliteal-tibial, -peroneal artery (in-situ vein)                                  | 35587 |
| popliteal-tibial, -peroneal artery (synthetic graft)                               | 35671 |
|                                                                                    |       |
| <b>Endovascular Surgery</b>                                                        |       |
| <i>Endovascular Aortoiliac</i>                                                     |       |
| iliac artery angioplasty                                                           | 37220 |
| iliac artery stent placement and angioplasty                                       | 37221 |
| iliac and additional ipsilateral iliac vessel angioplasty                          | 37222 |
| iliac and additional ipsilateral iliac vessel stent placement and angioplasty      | 37223 |
| Aortic angioplasty (open)                                                          | 35452 |
| Aortic angioplasty (percutaneous)                                                  | 35472 |
| Aortic atherectomy (open)                                                          | 35481 |
| Aortic atherectomy (percutaneous)                                                  | 35491 |
| iliac angioplasty (open)                                                           | 35454 |
| iliac atherectomy (open)                                                           | 35482 |
| iliac angioplasty (percutaneous)                                                   | 35473 |
| iliac atherectomy (percutaneous)                                                   | 35492 |

|                                                                                     |              |
|-------------------------------------------------------------------------------------|--------------|
| <i>Endovascular Femoral-popliteal</i>                                               |              |
| femoral, popliteal angioplasty                                                      | 37224        |
| femoral, popliteal atherectomy and angioplasty                                      | 37225        |
| femoral, popliteal stent placement and angioplasty                                  | 37226        |
| femoral, popliteal stent placement and atherectomy and angioplasty                  | 37227        |
| femoral-popliteal angioplasty (open)                                                | 35456        |
| femoral-popliteal atherectomy (open)                                                | 35483        |
| femoral-popliteal angioplasty (percutaneous)                                        | 35474        |
| femoral-popliteal atherectomy (percutaneous)                                        | 35493        |
| <i>Endovascular Tibial</i>                                                          |              |
| tibial, peroneal, unilateral angioplasty                                            | 37228        |
| tibial, peroneal atherectomy and angioplasty                                        | 37229        |
| tibial, peroneal stent placement and angioplasty                                    | 37230        |
| tibial, peroneal stent placement, atherectomy, and angioplasty                      | 37231        |
| tibial, peroneal and additional vessel angioplasty                                  | (+)<br>37232 |
| tibial, peroneal and additional vessel atherectomy and angioplasty                  | (+)<br>37233 |
| tibial, peroneal and additional vessel angioplasty and stent placement              | (+)<br>37234 |
| tibial, peroneal and additional vessel angioplasty, stent placement and atherectomy | (+)<br>37235 |
| tibioperoneal trunk and branches angioplasty (open)                                 | 35459        |
| tibioperoneal trunk and branches angioplasty (percutaneous)                         | 35470        |
| tibioperoneal trunk and branches atherectomy (open)                                 | 35485        |
| tibioperoneal trunk and branches atherectomy (percutaneous)                         | 35495        |

## Utilization and Outcomes of Local Anesthesia and Peripheral Nerve Block for Hybrid Lower Extremity Revascularization

Arash Fereydooni et al. *J Endovasc Ther.* 2020;27(1).

### Appendix 2. ICD-9 Code Categorization Into 3 Peripheral Artery Disease (PAD) Groups.

| ICD-9 Codes Categorized as CLTI: |                                                                       |
|----------------------------------|-----------------------------------------------------------------------|
| 440.22                           | Atherosclerosis of native arteries of the extremities with rest pain  |
| 440.23                           | Atherosclerosis of native arteries of the extremities with ulceration |
| 440.24                           | Atherosclerosis of native arteries of the extremities with gangrene   |
| 681.1                            | Unspecified cellulitis and abscess of toe                             |
| 682.2                            | Cellulitis and abscess of trunk                                       |
| 682.6                            | Cellulitis and abscess of leg except foot                             |
| 682.7                            | Cellulitis and abscess of foot except toes                            |
| 682.9                            | Cellulitis and abscess of unspecified sites                           |
| 686.9                            | Unspecified local infection of skin and subcutaneous tissue           |
| 707                              | Chronic ulcer of skin                                                 |
| 707.07                           | Decubitus ulcer heel                                                  |
| 707.1                            | Ulcer of lower limb except decubitus                                  |
| 707.1                            | Unspecified ulcer of lower limb                                       |
| 707.11                           | Ulcer of thigh                                                        |
| 707.12                           | Ulcer of calf                                                         |
| 707.13                           | Ulcer of ankle                                                        |
| 707.14                           | Ulcer of heel and midfoot                                             |
| 707.15                           | Ulcer of other part of foot                                           |
| 707.19                           | Ulcer of other part of lower limb                                     |
| 707.8                            | Chronic ulcer of other specified sites                                |
| 707.9                            | Chronic ulcer of unspecified site                                     |
| 730.05                           | Acute osteomyelitis involving pelvic region and thigh                 |
| 730.06                           | Acute osteomyelitis involving lower leg                               |
| 730.07                           | Acute osteomyelitis involving ankle and foot                          |
| 730.08                           | Acute osteomyelitis involving other specified sites                   |
| 730.16                           | Chronic osteomyelitis involving lower leg                             |
| 730.17                           | Chronic osteomyelitis involving ankle and foot                        |
| 730.18                           | Chronic osteomyelitis involving other specified sites                 |
| 730.2                            | Unspecified osteomyelitis site unspecified                            |
| 730.25                           | Unspecified osteomyelitis involving pelvic region and thigh           |
| 730.26                           | Unspecified osteomyelitis involving lower leg                         |
| 730.27                           | Unspecified osteomyelitis involving ankle and foot                    |

|                                                        |                                                                                                                 |
|--------------------------------------------------------|-----------------------------------------------------------------------------------------------------------------|
| 730.28                                                 | Unspecified osteomyelitis involving other specified sites                                                       |
| 730.29                                                 | Unspecified osteomyelitis involving multiple sites                                                              |
| 730.8                                                  | Other infections involving bone in diseases classified elsewhere                                                |
| 785.4                                                  | Gangrene                                                                                                        |
| 785.5                                                  | Shock without mention of trauma                                                                                 |
| 879.9                                                  | Open wound(s) (multiple) of unspecified site(s) complicated                                                     |
| 890                                                    | Open wound of hip and thigh without complication                                                                |
| 890.1                                                  | Open wound of hip and thigh complicated                                                                         |
| 891                                                    | Open wound of knee leg (except thigh) and ankle without complication                                            |
| 891.1                                                  | Open wound of knee leg (except thigh) and ankle complicated                                                     |
| 892                                                    | Open wound of foot except toe(s) alone without complication                                                     |
| 892.1                                                  | Open wound of foot except toe(s) alone complicated                                                              |
| 892.2                                                  | Open wound of foot except toe(s) alone with tendon involvement                                                  |
| 894                                                    | Multiple and unspecified open wound of lower limb without complication                                          |
| 894.1                                                  | Multiple and unspecified open wound of lower limb complicated                                                   |
| 998.83                                                 | Non-healing surgical wound                                                                                      |
| ICD-9 code for Intermittent Claudication               |                                                                                                                 |
| 440.21                                                 | Atherosclerosis of native arteries of the extremities with intermittent claudication                            |
| ICD-9 Codes Categorized as PAD Not Otherwise Specified |                                                                                                                 |
| 249.7                                                  | Secondary diabetes mellitus with peripheral circulatory manifestation not stated as uncontrolled or unspecified |
| 249.71                                                 | Secondary diabetes mellitus with peripheral circulatory manifestation uncontrolled                              |
| 250.7                                                  | Diabetes with peripheral circulatory disorders type II or unspecified type not stated as uncontrolled           |
| 250.71                                                 | Diabetes with peripheral circulatory disorders type I (juvenile type) not stated as uncontrolled                |
| 250.72                                                 | Diabetes with peripheral circulatory disorders type II or unspecified type uncontrolled                         |
| 250.73                                                 | Diabetes with peripheral circulatory disorders type I (juvenile type) uncontrolled                              |
| 440                                                    | Atherosclerosis                                                                                                 |
| 440.2                                                  | Atherosclerosis of native arteries of the extremities                                                           |
| 440.29                                                 | Other atherosclerosis of native arteries of the extremities                                                     |
| 440.3                                                  | Atherosclerosis of unspecified bypass graft of the extremities                                                  |
| 440.31                                                 | Atherosclerosis of autologous vein bypass graft of the extremities                                              |
| 440.32                                                 | Atherosclerosis of nonautologous biological bypass graft of the extremities                                     |
| 440.4                                                  | Chronic total occlusion of artery of the extremities                                                            |
| 440.8                                                  | Atherosclerosis of other specified arteries                                                                     |

|        |                                                           |
|--------|-----------------------------------------------------------|
| 440.9  | Generalized and unspecified atherosclerosis               |
| 443    | Other peripheral vascular disease                         |
| 443.8  | Other specified peripheral vascular diseases              |
| 443.81 | Peripheral angiopathy in diseases classified elsewhere    |
| 443.89 | Other peripheral vascular disease                         |
| 443.9  | Peripheral vascular disease unspecified                   |
| 444    | Arterial embolism and thrombosis                          |
| 444    | Arterial embolism and thrombosis of abdominal aorta       |
| 444.01 | Saddle embolus of abdominal aorta                         |
| 444.09 | Other arterial embolism and thrombosis of abdominal aorta |
| 444.1  | Embolism and thrombosis of thoracic aorta                 |
| 444.2  | Embolism and thrombosis of arteries of the extremities    |
| 444.21 | Arterial embolism and thrombosis of upper extremity       |
| 444.22 | Arterial embolism and thrombosis of lower extremity       |
| 444.8  | Embolism and thrombosis of other specified artery         |
| 444.81 | Embolism and thrombosis of iliac artery                   |
| 444.89 | Embolism and thrombosis of other artery                   |
| 444.9  | Embolism and thrombosis of unspecified artery             |
| 445    | Atheroembolism of extremities                             |
| 445.02 | Atheroembolism of lower extremity                         |
| 445.89 | Atheroembolism of other site                              |
| 447.1  | Stricture of artery                                       |
| 459    | Other disorders of circulatory system                     |
| 459.8  | Other specified disorders of circulatory system           |
| 459.89 | Other specified circulatory system disorders              |
| 459.9  | Unspecified circulatory system disorder                   |
| 707.23 | Pressure ulcer stage III                                  |
| 707.25 | Pressure ulcer unstageable                                |
| 729.5  | Pain in limb                                              |
| 729.82 | Cramp of limb                                             |
| 729.89 | Other musculoskeletal symptoms referable to limbs         |
| 997.7  | Vascular complications of other vessels                   |
| 997.79 | Vascular complications of other vessels                   |
| 998.3  | Disruption of wound unspecified                           |

## Utilization and Outcomes of Local Anesthesia and Peripheral Nerve Block for Hybrid Lower Extremity Revascularization

Arash Fereydooni et al. *J Endovasc Ther.* 2020;27(1).

### Appendix 3. ICD-10 Code Categorization Into 3 Peripheral Artery Disease (PAD) Groups.

|                                  |                                                             |
|----------------------------------|-------------------------------------------------------------|
| I70.212                          | Athscl native art of extrm w intrmt claud l leg             |
| I70.213                          | Athscl native art extrm w intrmt claud bi legs              |
| I70.312                          | Athscl unsp tp byp of extrm w intrmt claud l leg            |
| I70.211                          | Athscl native art of extrm w intrmt claud r leg             |
| I70.313                          | Athscl usp tp byp extrm w intrmt claud bi legs              |
| I70.411                          | Athscl autol vein byp extrm w intrmt claud r leg            |
| I70.218                          | Athscl native art extrm w intrmt claud ot extrm             |
| I70.713                          | Athscl tp of byp of extrm w intrmt claud bi legs            |
| I70.412                          | Athscl autol vein byp extrm w intrmt claud l leg            |
| I70.219                          | Athscl native art extrm w intrmt claud usp extrm            |
| I70.311                          | Athscl unsp tp byp of extrm w intrmt claud r leg            |
| I70.612                          | Athscl nonbiol byp of extrm w intrmt claud l leg            |
| I70.712                          | Athscl type of byp of extrm w intrmt claud l leg            |
| I70.21                           | Athscl native art of extrem w intermittent claud            |
| I70.511                          | Athscl nonaut bio bypass of extrm w intrmt claud, right leg |
| ICD-10 Codes Categorized as CLTI |                                                             |
| I70.222                          | Athscl native art of extrem w rest pain left leg            |
| I70.221                          | Athscl native art of extrm w rest pain right leg            |
| I70.223                          | Athscl native art of extrm w rest pain bi legs              |
| I70.245                          | Athscl native art of left leg w ulc oth prt foot            |
| I70.243                          | Athscl native art of left leg w ulcer of ankle              |
| I70.262                          | Athscl native art of extrem w gangrene left leg             |
| I70.263                          | Athscl native art of extrm w gangrene bi legs               |
| I70.238                          | Athscl natv art of r leg w ulc oth prt low r leg            |
| I70.235                          | Athscl native art of r leg w ulcer oth prt foot             |
| I70.232                          | Athscl native art of right leg w ulcer of calf              |
| I70.22                           | Athscl native arteries of extrem w rest pain                |
| E11.52                           | Type 2 dbt w diab periph angiopath w gangrene               |
| I70.269                          | Athscl native art of extrm w gangr unsp extrem              |
| I70.261                          | Athscl native art of extrem w gangrene right leg            |
| I70.244                          | Athscl native art of l leg w ulc of heel & midft            |

|          |                                                              |
|----------|--------------------------------------------------------------|
| T87.43   | Infection amputation stump right lower extremity             |
| I70.234  | Athscl native art of r leg w ulc of heel & midft             |
| I96      | Gangrene, not elsewhere classified                           |
| I70.239  | Athscl native art of r leg w ulcer of unsp site              |
| I70.629  | Athscl nonbiol byp extrm w rest pain usp extrm               |
| L03.115  | Cellulitis of right lower limb                               |
| M86.171  | Other acute osteomyelitis, right ankle and foot              |
| I70.229  | Athscl native art of extrm w rest pain usp extrm             |
| I70.321  | Athscl unsp type byp of extrm w rest pain r leg              |
| E11.621  | Type 2 diabetes mellitus with foot ulcer                     |
| I70.248  | Athscl native art of l leg w ulc ot prt lo l leg             |
| I70.25   | Athscl native arteries of extrem w ulceration                |
| I70.421  | Athscl autol vein byp of extrm w rest pain r leg             |
| L97.929  | Non-prs chr ulc usp prt of l lo leg w usp severt             |
| I70.249  | Athscl native art of left leg w ulc of unsp site             |
| I70.24   | Aths of native arteries of left leg w ulceration             |
| I70.362  | Athscl unsp type byp of extrm w gangr left leg               |
| A41.9    | Sepsis, unspecified organism                                 |
| I70.228  | Athscl native art of extrm w rest pain oth extrm             |
| I70.461  | Athscl autol vein byp of extrm w gangr right leg             |
| I70.334  | Athscl unsp tp byp of r leg w ulc of heel&midft              |
| I70.268  | Athscl native art of extrm w gangrene oth extrem             |
| M86.9    | Osteomyelitis, unspecified                                   |
| I70.242  | Athscl native art of left leg w ulcer of calf                |
| E10.52   | Type 1 dbt w diab periph angiopath w gangrene                |
| I70.233  | Athscl native art of right leg w ulcer of ankle              |
| I70.322  | Athscl unsp type byp of extrm w rest pain l leg              |
| I70.23   | Aths of native arteries of right leg w ulcer                 |
| E11.622  | Type 2 diabetes mellitus with other skin ulcer               |
| I70.628  | Athscl nonbiol byp of extrm w rest pain ot extrm             |
| L03.116  | Cellulitis of left lower limb                                |
| E13.51   | Oth dbt w diabetic periph angiopath w/o gangrene             |
| I70.721  | Athscl type of byp of extrm w rest pain r leg                |
| I70.335  | Athscl unsp type byp of r leg w ulc oth prt foot             |
| E10.51   | Type 1 dbt w diab periph angiopath w/o gangrene              |
| S91.109A | Unsp open wnd of unsp toe w/o damag to nail init             |
| M79.671  | Pain in right foot                                           |
| L97.529  | Non-pressure chronic ulcer oth prt left foot w unsp severity |
| L97.423  | Non-prs chr ulcer of left heel and midfoot w necros muscle   |



|                                                         |                                                              |
|---------------------------------------------------------|--------------------------------------------------------------|
| I70.462                                                 | Athscl autol vein bypass of the extrm w gangrene, left leg   |
| L97.514                                                 | Non-prs chronic ulcer oth prt right foot w necrosis of bone  |
| I70.361                                                 | Athscl unsp type bypass of the extrm w gangrene, right leg   |
| A41.50                                                  | Gram-negative sepsis, unspecified                            |
| L97.509                                                 | Non-pressure chronic ulcer oth prt unsp foot w unsp severity |
| T87.44                                                  | Infection of amputation stump, left lower extremity          |
| L98.499                                                 | Non-pressure chronic ulcer of skin of sites w unsp severity  |
| A41.52                                                  | Sepsis due to Pseudomonas                                    |
| I70.639                                                 | Athscl nonbiol bypass of the right leg w ulcer of unsp site  |
| I70.323                                                 | Athscl unsp type bypass of the extrm w rest pain, bi legs    |
| L97.919                                                 | Non-prs chronic ulc unsp prt of r low leg w unsp severity    |
| L97.329                                                 | Non-pressure chronic ulcer of left ankle with unsp severity  |
| L97.909                                                 | Non-prs chronic ulc unsp prt of unsp low leg w unsp severity |
| I70.645                                                 | Athscl nonbiol bypass of the left leg w ulcer oth prt foot   |
| I70.363                                                 | Athscl unsp type bypass of the extrm w gangrene, bi legs     |
| I70.621                                                 | Athscl nonbiol bypass of the extrm w rest pain, right leg    |
| I70.231                                                 | Athscl native arteries of right leg w ulceration of thigh    |
| I70.522                                                 | Athscl nonaut bio bypass of the extrm w rest pain, left leg  |
| I70.444                                                 | Athscl autol vein bypass of left leg w ulc of heel and midft |
| ICD-10 Codes Categorized as PAD Not Otherwise Specified |                                                              |
| E11.69                                                  | Type 2 diab mel with other specified compl                   |
| I73.9                                                   | Peripheral vascular disease, unspecified                     |
| I70.92                                                  | Chronic total occlusion of artery of the extrem              |
| T82.868A                                                | Thrombosis of vascular prosth dev/grft, init                 |
| I74.5                                                   | Embolism and thrombosis of iliac artery                      |
| I70.203                                                 | Unsp athscl native arteries of extrem bi legs                |
| I74.9                                                   | Embolism and thrombosis of unspecified artery                |
| I99.8                                                   | Other disorder of circulatory system                         |
| I74.3                                                   | Mblsm and thrombosis of art of the lower extrem              |
| I70.8                                                   | Atherosclerosis of other arteries                            |
| T82.858A                                                | Stenosis of vascular prosth dev/grft, init                   |
| I70.202                                                 | Unsp athscl native arteries of extrem left leg               |
| I74.09                                                  | Other arterial mblsm and thrombosis of abd aorta             |
| I73.89                                                  | Other specified peripheral vascular diseases                 |
| I75.022                                                 | Atheroembolism of left lower extremity                       |
| I70.201                                                 | Unsp athscl native arteries of extrem right leg              |
| E11.51                                                  | Type 2 dbt w diab periph angiopath w/o gangrene              |
| I77.1                                                   | Stricture of artery                                          |
| R09.89                                                  | Oth symp&signs involving the circ&resp systems               |

|          |                                                             |
|----------|-------------------------------------------------------------|
| I70.209  | Unsp athscl native art of extrem unsp extrem                |
| I70.0    | Atherosclerosis of aorta                                    |
| I70.90   | Unspecified atherosclerosis                                 |
| I74      | Arterial embolism and thrombosis                            |
| I70.701  | Unsp athscl type of byp of the extrem right leg             |
| I70.293  | Oth athscl native arteries of extrem bi legs                |
| I77.9    | Disorder of arteries and arterioles, unspecified            |
| I75.02   | Atheroembolism of lower extremity                           |
| I70.299  | Oth athscl native arteries of extrem unsp extrem            |
| I70.292  | Oth athscl native arteries of extrem left leg               |
| I70.402  | Unsp athscl autol vein byp of the extrm left leg            |
| I73      | Other peripheral vascular diseases                          |
| I74.8    | Embolism and thrombosis of other arteries                   |
| T82.818A | Embolism of vascular prosth dev/grft, init                  |
| E11.5    | Type 2 diab mel with circulatory complications              |
| I79.8    | Oth disord of art,arterioles&capilare in dis c/e            |
| I70.301  | Unsp athscl unsp type byp of the extrm right leg            |
| I70.291  | Oth athscl native arteries of extrem right leg              |
| I70.9    | Other and unspecified atherosclerosis                       |
| I70.2    | Aths of native arteries of the extremities                  |
| T82.8    | Oth comp of cardiac and vascular prosth dev/grft            |
| I73.8    | Other specified peripheral vascular diseases                |
| I70.20   | Unsp aths of native arteries of extremities                 |
| I74.10   | Embolism and thrombosis of usp parts of aorta               |
| T82.868  | Thrombosis due to vascular prosth dev/grft                  |
| I77.89   | Other specified disorders of arteries and arterioles        |
| I70.502  | Unsp athscl nonaut bio bypass of the extremities, left leg  |
| I74.0    | Embolism and thrombosis of abdominal aorta                  |
| I70.208  | Unsp athscl native arteries of extremities, oth extremity   |
| I99.9    | Unspecified disorder of circulatory system                  |
| T82.856A | Stenosis of peripheral vascular stent, initial encounter    |
| I74.4    | Embolism and thrombosis of arteries of extremities, unsp    |
| I75.021  | Atheroembolism of right lower extremity                     |
| I70      | Atherosclerosis                                             |
| I70.491  | Oth athscl autologous vein bypass of the extrm, right leg   |
| I13.2    | Hyp hrt & chr kdny dis w hrt fail and w stg 5 chr kdny/ESRD |
| I74.01   | Saddle embolus of abdominal aorta                           |
| I13.0    | Hyp hrt & chr kdny dis w hrt fail and stg 1-4/unsp chr kdny |
